# Supplementary material for: COVID-19 Infection in Pregnancy: PCR Cycle Thresholds, Placental Pathology, and Perinatal Outcomes
Source: MDPI journal article supplement (doi:10.3390/v13091884), 2021-09-21
Supplement: s1 [file s1]

Supplementary Materials:

Table S1. Symptomatology.

| Symptoms              | COVID-19 Positive<br>(299)<br>Mean ± SD<br>N (%) | COVID-19 Negative<br>(828)<br>Mean ± SD<br>N (%) | All Patients<br>(1127)<br>Mean ± SD<br>N (%) | <i>p</i> |
|-----------------------|--------------------------------------------------|--------------------------------------------------|----------------------------------------------|----------|
| Cough                 | 7 (2.4)                                          | 1 (<1)                                           | 8 (<1)                                       | 0.001    |
| Fever                 | 9 (3)                                            | 7 (0.9)                                          | 16 (1.4)                                     | 0.018    |
| Headache              | 13 (4.4)                                         | 15 (1.8)                                         | 28 (2.5)                                     | 0.019    |
| Dyspnea               | 4 (1.3)                                          | 0                                                | 4 (<1)                                       | 0.005    |
| Myalgias              | 3 (1)                                            | 0                                                | 3 (<1)                                       | 0.019    |
| Rhinorrhea            | 1 (<1)                                           | 0                                                | 1 (<1)                                       | 0.266    |
| Diarrhea              | 2 (<1)                                           | 1 (<1)                                           | 3 (<1)                                       | 0.174    |
| Thrombosis            | 1 (<1)                                           | 1 (<1)                                           | 2 (<1)                                       | 0.466    |
| Neurological symptoms | 2 (<1)                                           | 3 (<1)                                           | 4 (<1)                                       | 0.613    |
| Arrhythmia            | 2 (<1)                                           | 2 (<1)                                           | 4 (<1)                                       | 0.578    |
| Lethargy              | 0                                                | 0                                                | 0                                            | omitted  |

Table S2. Stepwise logistic regression for COVID19 manifestations and PCR positivity.

| Parameter | Estimate | Standard Error | Wald Chi-Square | <i>p</i> |
|-----------|----------|----------------|-----------------|----------|
| Intercept | 15.9076  | 477.3          | 0.0011          | 0.9734   |
| Cough Yes | 2.845    | 1.082          | 6.9             | 0.0085   |

Table S3. ANOVA.

|                               | F     | <i>p</i> | Partial Eta Squared |
|-------------------------------|-------|----------|---------------------|
| Pre-pregnancy BMI             | 0.057 | 0.811    | 0.001               |
| Asymptomatic vs. asymptomatic | 0.581 | 0.448    | 0.006               |

Table S4. Logistic regression model for preeclampsia and preterm birth.

| Parameter                 | Estimate | SE   | Wald Chi-Square | <i>p</i> | OR    | Lower Bound CI 95% | Upper Bound CI 95% |
|---------------------------|----------|------|-----------------|----------|-------|--------------------|--------------------|
| Preeclampsia              |          |      |                 |          |       |                    |                    |
| Symptomatic for COVID-19  | 2.7      | 0.93 | 8.44            | 0.004    | 14.72 | 2.40               | 90.4               |
| Preterm delivery          |          |      |                 |          |       |                    |                    |
| Preeclampsia              | 3.18     | 1.43 | 4.9             | 0.027    | 24    | 1.44               | 399                |
| Gestational age at triage | -0.66    | 0.22 | 11.04           | 0.001    | 0.514 | 0.34               | 0.76               |
